# Supplementary material
Source: MDPI journal article supplement (https://www.mdpi.com/2673-4931/19/1/37)
Supplement: s1 [file s1]

# Assessing the Impact of COVID-19 Lockdown on Surface Urban Heat Island and Normalized Difference Vegetation Index in Dhaka Megacity, Bangladesh.

Muhammad Mainuddin Patwary (1,2); Md. Mijanur Rahman (3);

(1) Environment and Sustainability Research Initiative, Khulna, Bangladesh; (2) Environmental Science Discipline, Life Science School, Khulna University, Khulna, Bangladesh; (3) Department of Geography, Jagannath University, Dhaka, Bangladesh;

## Introduction

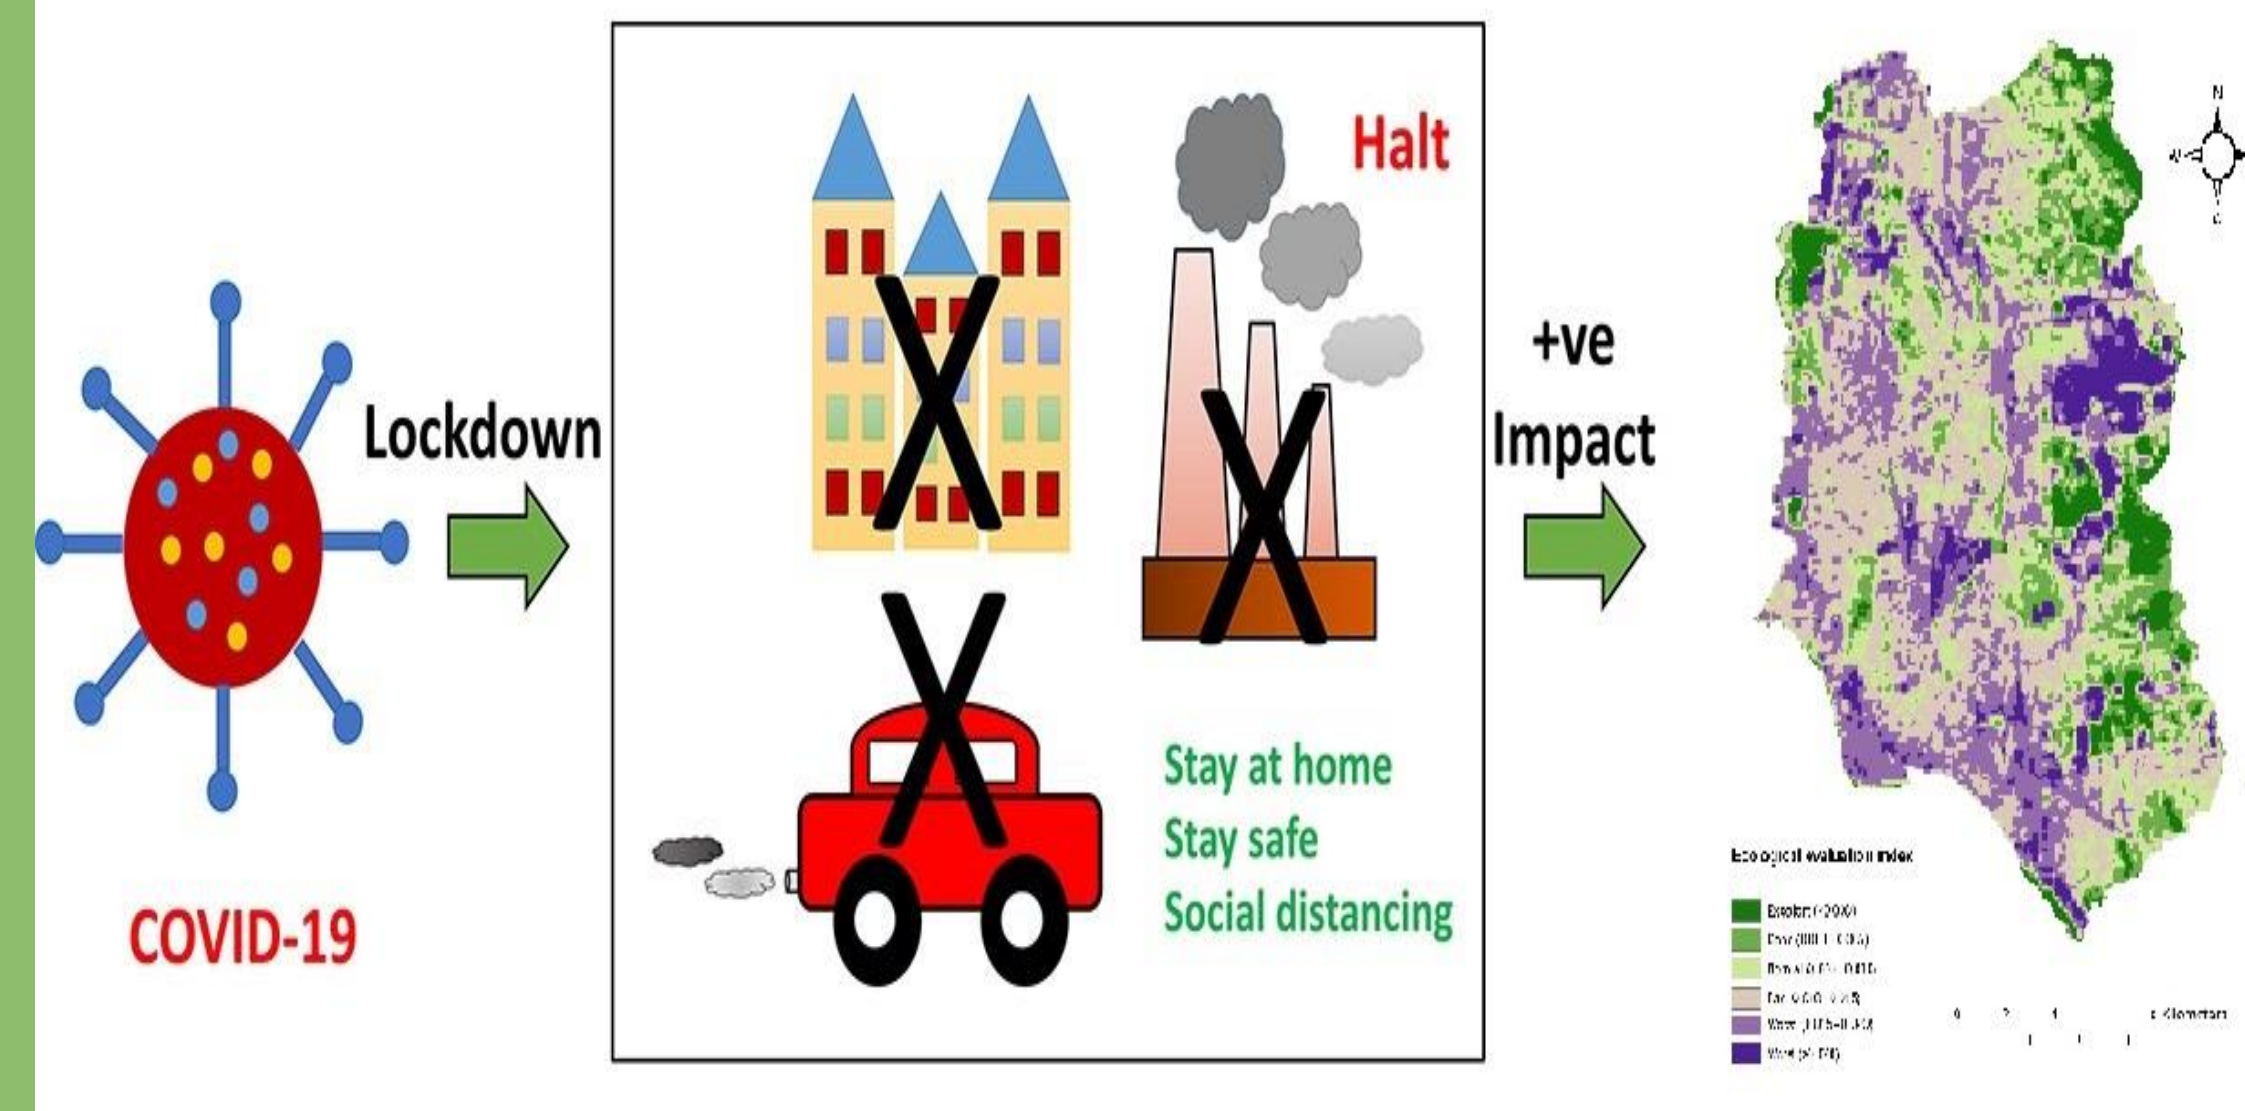

## Findings

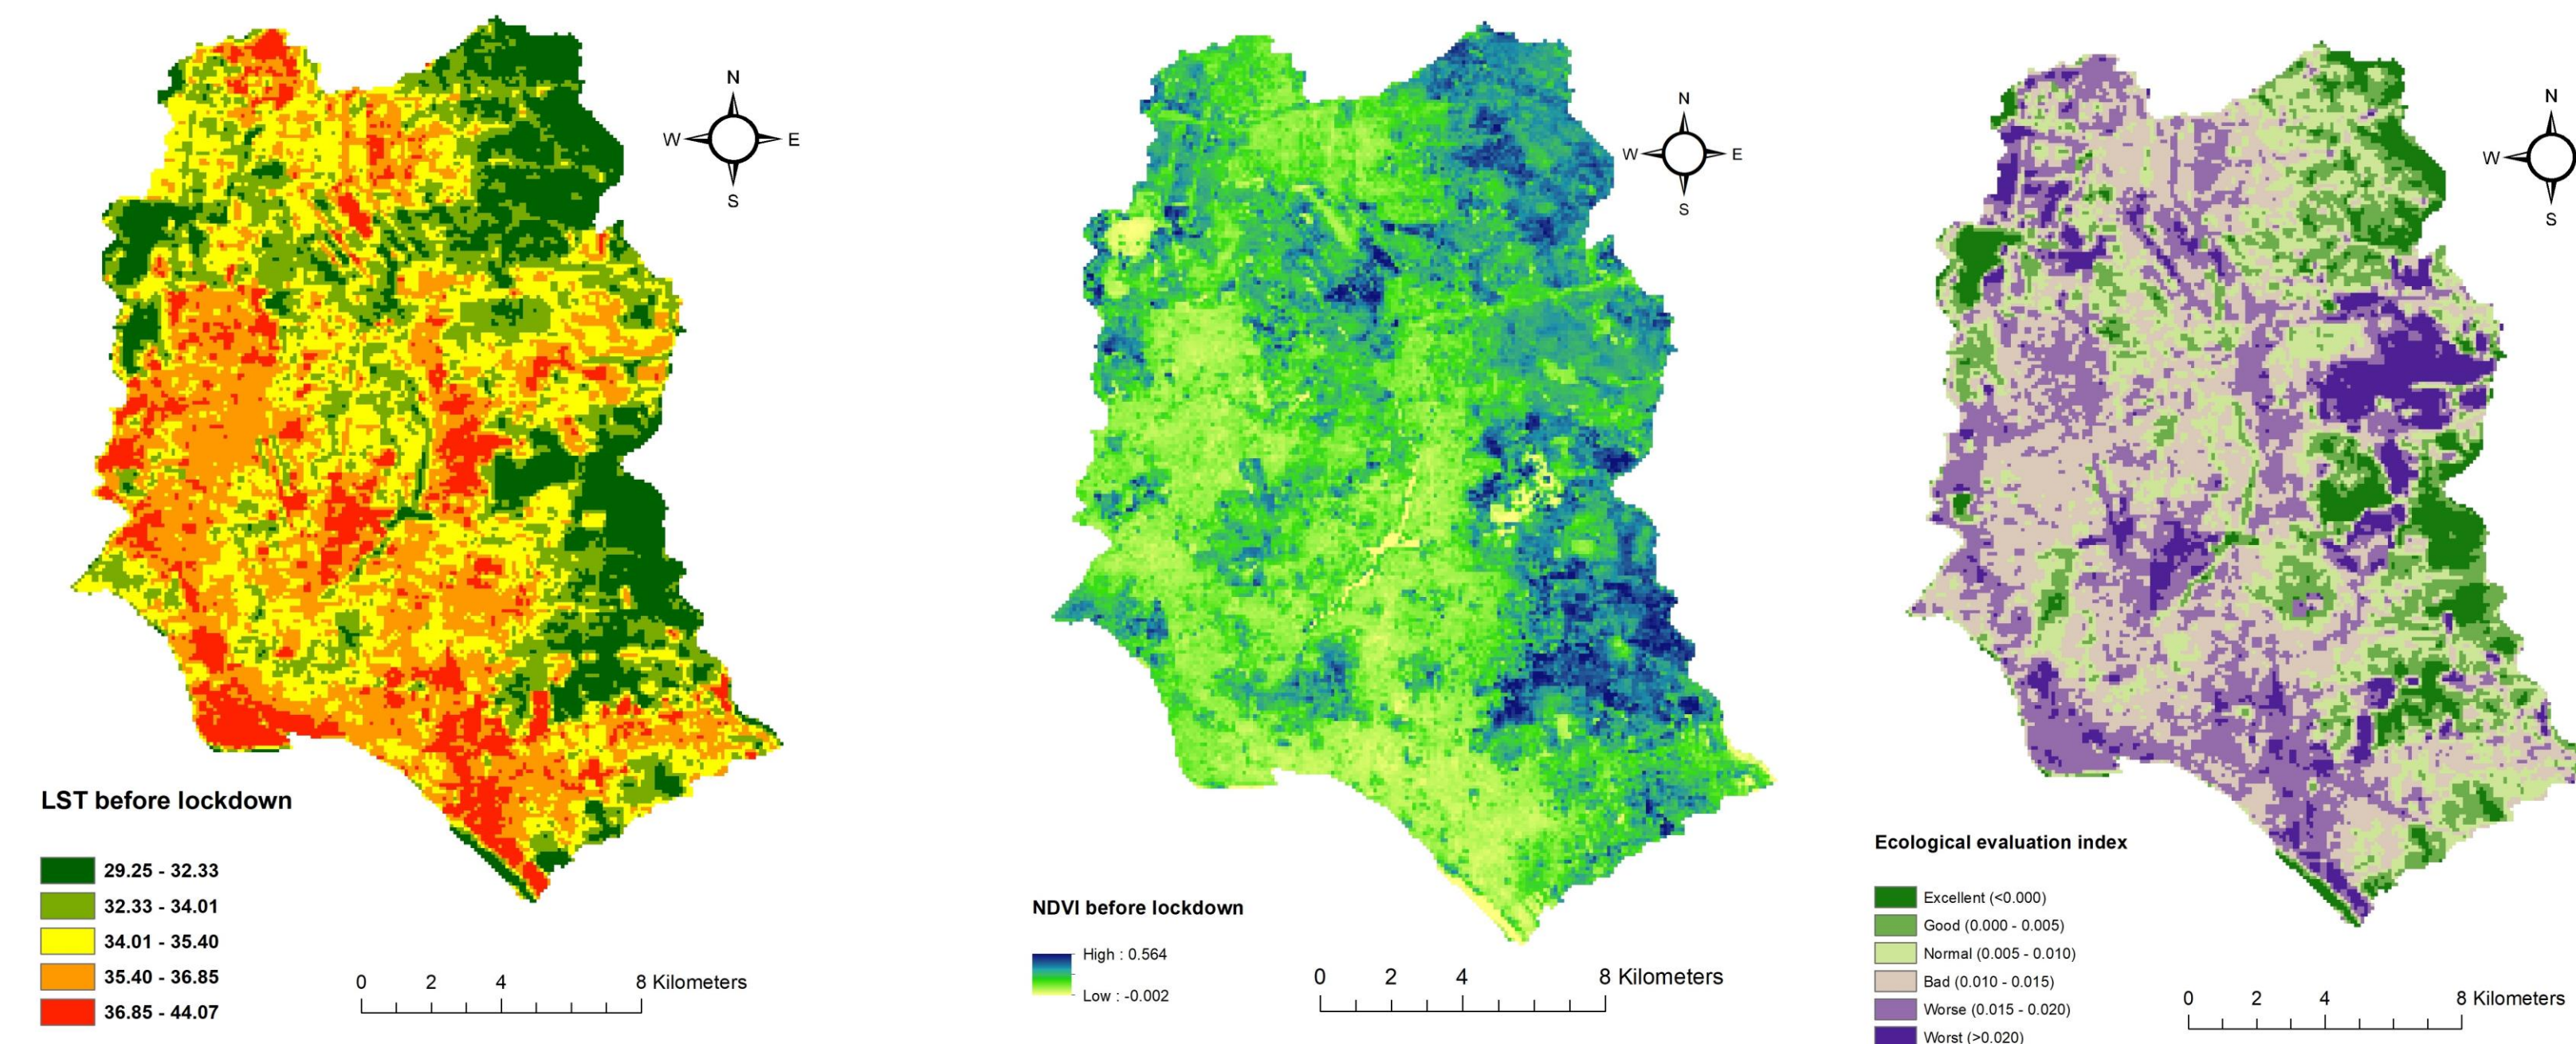

- ✓ The findings show that the LST of Dhaka City decreased and the NDVI increased throughout the lockdown period, with the LST-NDVI connection becoming more negative.
- ✓ Additionally, the analysis demonstrates that the city's ecological status was improved during the lockdown.
- ✓ Numerous actions have been made at the global and regional levels to control increasing temperature and climate change, but no positive consequence has been achieved yet.

## Methods

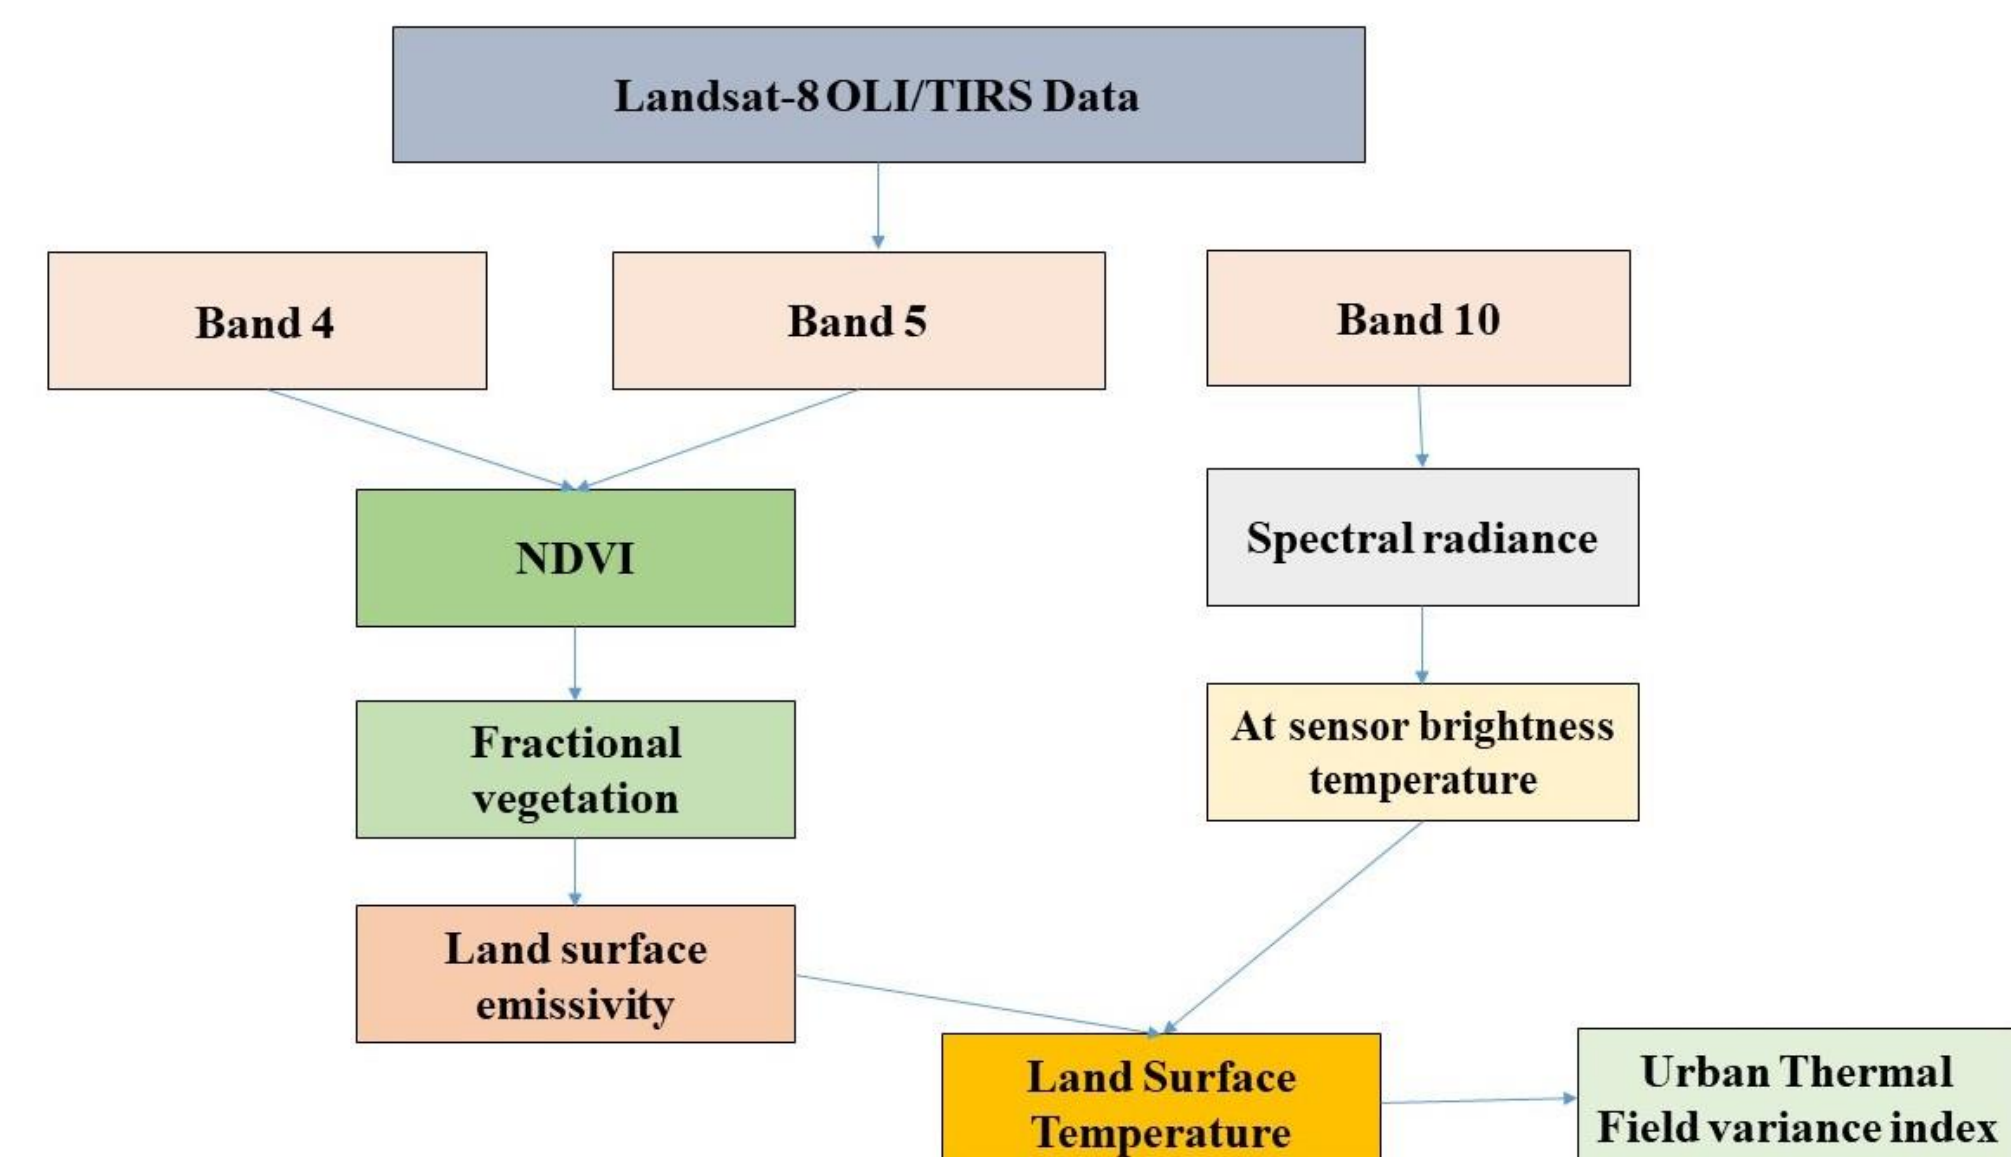

Figure 1. Flow diagram of study design.

## Pre-lockdown condition

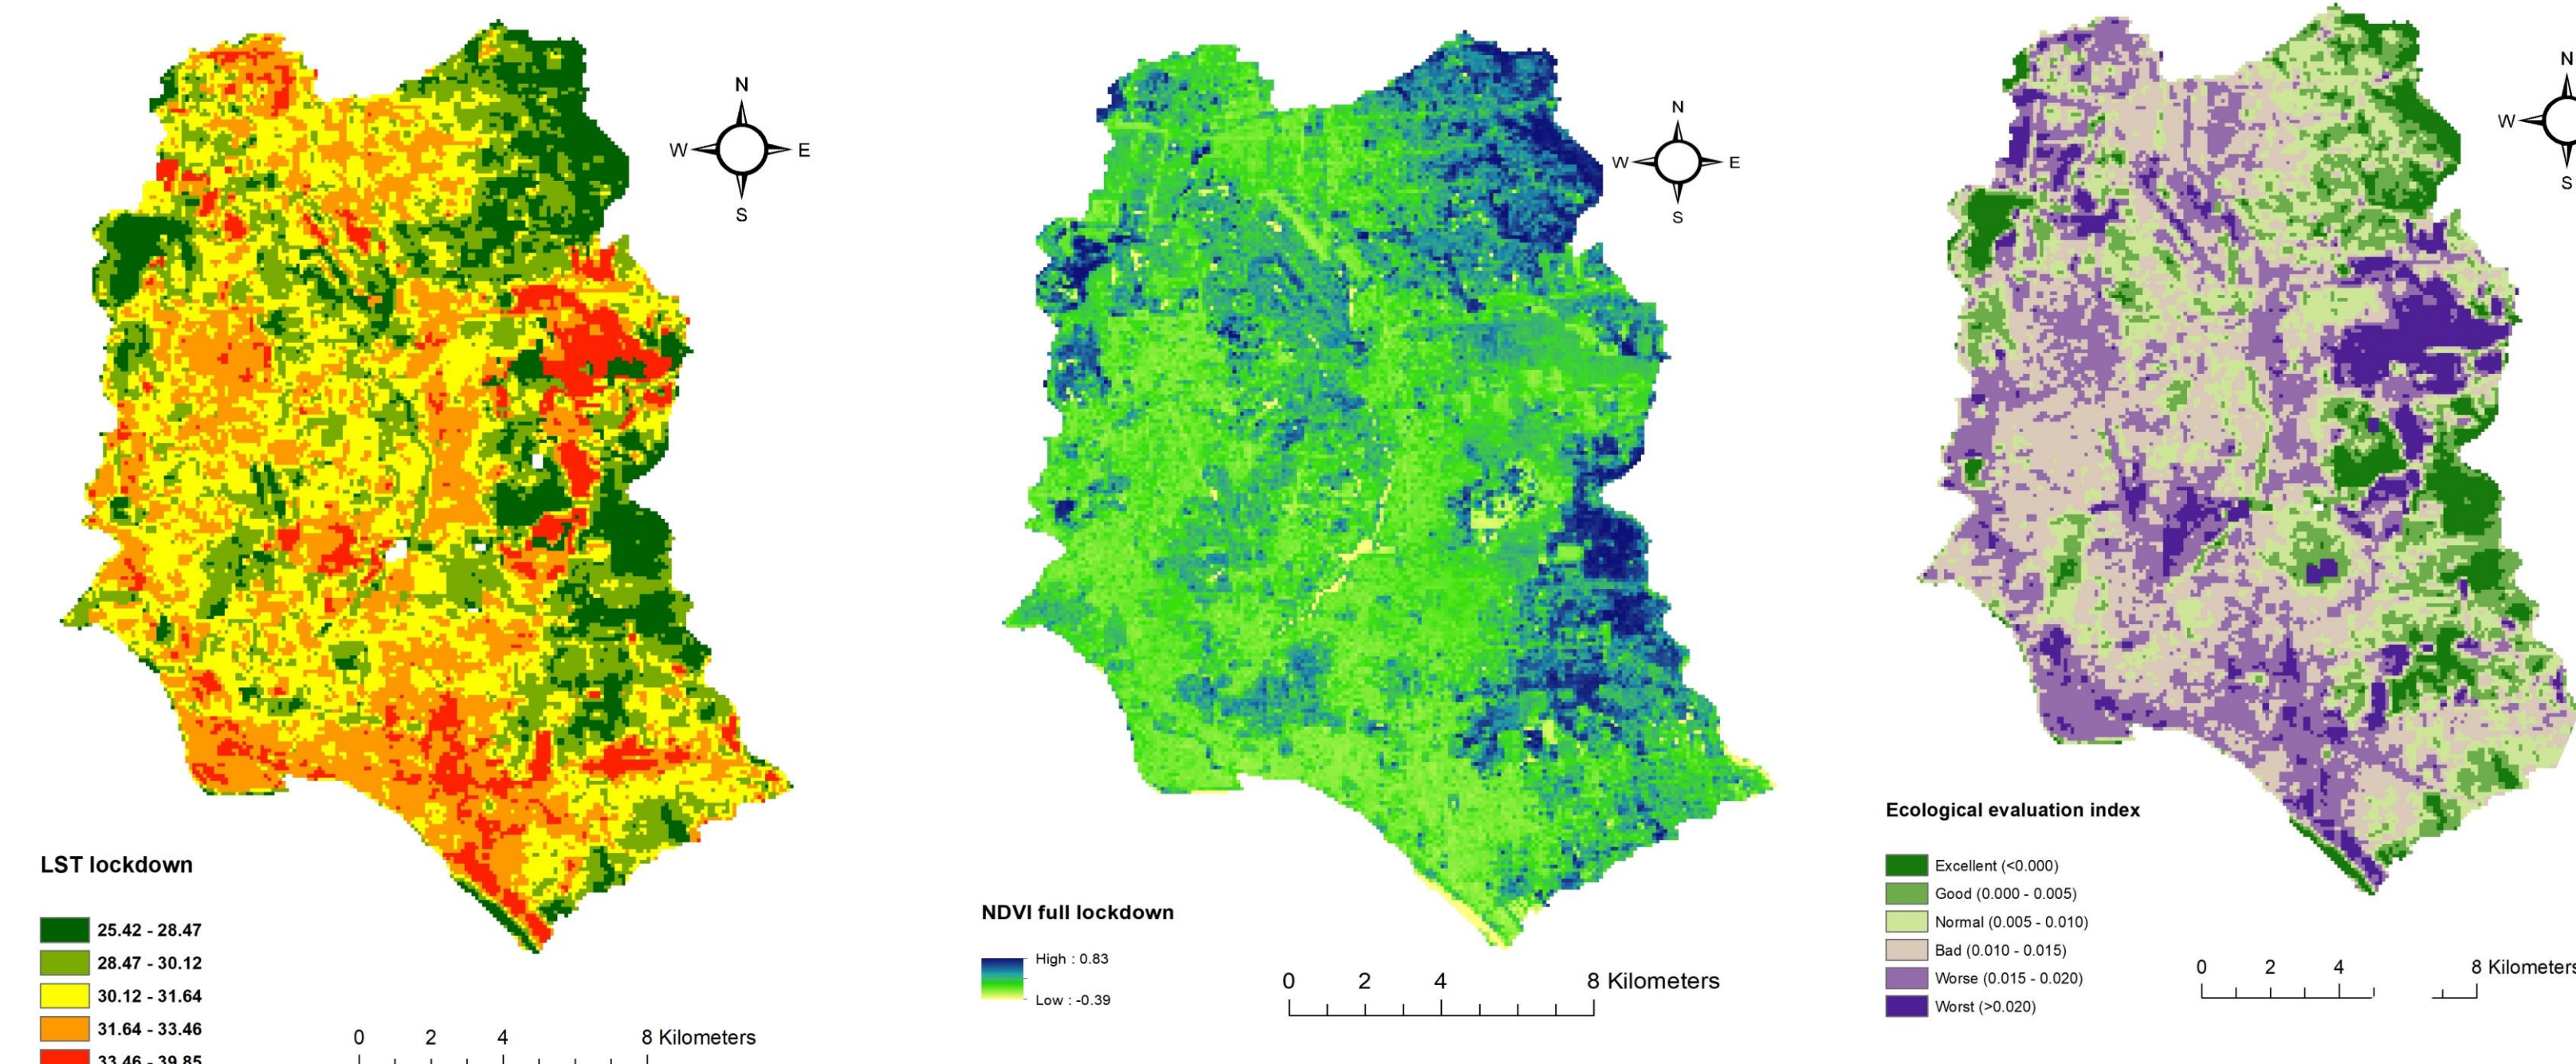

## During lockdown

Figure 2. LST, NDVI and Ecological evaluation status before and during lockdown in Dhaka City.

## Implications

## Conclusion

- While such a lockdown (temporarily) is detrimental to economic progress, it demonstrated the curative impact of urban climate.
- Thus, the findings of this study could provide a quantitative foundation for decision-makers for surface heat island mitigation and public health care.
